# Supplementary material
Source: PubMed Central journal article supplement (PMC6289276)
Supplement: NIHMS1508464-supplement-4.pdf [file NIHMS1508464-supplement-4.pdf]

Supplementary Table S14. Demographics and Clinical Characteristics of CVID Patients With and Without Enteropathy

|                                        | CVID Patients with Enteropathy | CVID Patients without Enteropathy | p value |
|----------------------------------------|--------------------------------|-----------------------------------|---------|
| Age (y)                                | 41.6 +/- 5.8                   | 35 +/- 7.2                        | 0.4     |
| Duration of CVID (y)                   | 7.4 +/- 2.3                    | 14 +/- 7.0                        | 0.2     |
| Body Mass Index                        | 20.1 +/- 2.1                   | 24.5 +/- 3.1                      | .07     |
| Erythrocyte sedimentation rate (mm/hr) | 15.5 +/- 6.3                   | 7.2 +/- 3.8                       | .08     |
| C-Reactive Protein                     | 3.4 +/- 1.3                    | 1.5 +/- 1.1                       | 0.3     |
| Serum Albumin                          | 2.7 +/- 0.1                    | 3.9 +/- 0.2                       | .02     |
| Serum Protein                          | 5.5 +/- 0.2                    | 6.7 +/- 0.2                       | < .01   |
| Number of Liquid Stools                | 5.8 +/- 1.1                    | 1.8 +/- 1.2                       | < .01   |
| IgG Trough Level (at time of biopsy)   | 844 +/- 318 *                  | 1070 +/- 132                      | 0.2     |

Values are mean +/- standard error of mean

- Patients with Enteropathy have protein losing enteropathy

Supplementary Table S15. Histopathological findings in duodenal biopsies.

CVID Patients with Enteropathy

|   |                                                                                                          |
|---|----------------------------------------------------------------------------------------------------------|
| 1 | Marked villous blunting, Increased IELs and lamina propria lymphocytes                                   |
| 2 | Mild villous blunting, Increased IELs, Focal active duodenitis with increased lamina propria lymphocytes |
| 3 | Marked villous blunting, Increased IELs and lamina propria lymphocytes, Increased eosinophils (>50hpf)   |
| 4 | Marked villous blunting, Increased IELs and lamina propria lymphocytes                                   |
| 5 | Patchy villous blunting, Increased IELs and lamina propria lymphocytes                                   |
| 6 | Marked Villous blunting, Increased IELs and lamina propria lymphocytes, scattered apoptotic cells        |
| 7 | Villous blunting, Increased IELs, Decreased number of goblet cells, scattered apoptotic cells            |

CVID Patients without Enteropathy

|   |                                                                      |
|---|----------------------------------------------------------------------|
| 1 | Normal Villi and IEL number                                          |
| 2 | Mild villous blunting, with mild increase in IEL number              |
| 3 | Normal Villi, Scattered lymphoid aggregates without germinal centers |
| 4 | Normal Villi and IEL number                                          |
| 5 | Normal Villi, Scattered lymphoid aggregates                          |
| 6 | Normal Villi with mild mucosal edema Present                         |
| 7 | Normal Villi and IEL number                                          |
| 8 | Normal Villi, mild edema                                             |

Control Patients

|   |                        |
|---|------------------------|
| 1 | Normal duodenal mucosa |
| 2 | Normal duodenal mucosa |
| 3 | Normal duodenal mucosa |
| 4 | Normal duodenal mucosa |
| 5 | Normal duodenal mucosa |
| 6 | Normal duodenal mucosa |
| 7 | Normal duodenal mucosa |
